# Supplementary material for: Phylogenetic and functional analysis of tiller angle control homeologs in allotetraploid cotton
Source: Front Plant Sci. 2024 Jan 31;14:1320638. doi: 10.3389/fpls.2023.1320638 (PMC10864623; doi:10.3389/fpls.2023.1320638)
Supplement: Supplementary file 7 [file Table_1.xlsx]

## Sheet: Sheet2
Table S1. Primer sequences for qPCR			Table S2. GhiTAC1 sequence similarity among homeologs				Table S3. Deletion type in different events				Table S4. BLASTN alignment of guide RNAs to the Coker312 reference assembly													Table S5. Percent identity distance matrix of TAC1 between peach and cotton (Coker312).								Table S6. CRISPR/Cas9 gene editing design							Table S7. Examples of GhiTAC1 editing in Coker312 by CRISPR/Cas9
Primer	Sequence			gRNA1 target	gRNA2 target		Event examples	GhCoker.A11G109300.1	GhCoker.D11G112200.1		qseqid	sseqid	pident	length	mismatch	gapopen	qstart	qend	sstart	send	evalue	bitscore			A12G131200.1	D12G137700.1	A11G109300.1	D11G112200.1	A08G143500.1	D08G158700.1			Length	Direction	Enzyme	PAM	SpCas9 cuts prediction		Editing type	Edited details	Genome
qA08 F	CGGTTTCGATCCTTTGAAATCCTTG		GhCoker.D11G112200.1	CTTCGTAGCTCCCCGAAGCT	AGTGGCACTGGTTGACATGC		tac1-72	94 bp deletion	93 bp deletion		guide_1	D11	100	23	0	0	1	23	9181843	9181821	0.000519	43.6		A12G131200.1		73.36	41.69	41.69	32.99	38.78		CRISPR guide 1: CTTCGTAGCTCCCCGAAGCTAGG	23	reverse	SpCas9	AGG	Cuts 3-4bp upstream of the PAM		93 bp deletion	the deletions include 3 bp of upstream the PAMs	A and D
qA08 R	AGAGAATCGTTCTTCTTCTTCT		GhCoker.A11G109300.1	CTTCGTAGCTCCCCGAAGCT	AGTGGCACTGGTTGACATGC		tac1-73	93 bp deletion	93 bp deletion		guide_1	A11	100	23	0	0	1	23	9993543	9993521	0.000519	43.6		D12G137700.1	73.36		33.11	33.11	30.45	35.8		CRISPR guide 2: AGTGGCACTGGTTGACATGCTGG	23	forward	SpCas9	TGG	Cuts 3-4bp upstream of the PAM		94 bp deletion	the deletions include 3/4 bp of upstream the PAMs	A and D
qD08 F	CGGTTTCGATCCTTTGAAATCCTTA		GhCoker.D08G158700.1	CGTCGCTGCTTTCAGGAGGT	AGTAGCACTGTTCGACCTGC		tac1-74	89 bp inversion	93 bp deletion		guide_1	D05	100	18	0	0	3	20	9522124	9522107	0.31	34.4		A11G109300.1	41.69	33.11		96.89	50.81	55.52									’A’ insertion	insertion in the 3 bp of upstream the PAM of gRNA2	A and D
qD08 R	AGAGAATCGTTCTTCTTCTTCG		GhCoker.A08G143500.1	CGCCGTTGCTTTCAGGAGGT	AGTAGCACTGTTCGACCTGC						guide_1	A05	100	18	0	0	3	20	10611367	10611350	0.31	34.4		D11G112200.1	41.69	33.11	96.89		51.47	55.86									89 bp inversion	the deletions include 8 bp of upstream the PAMs	A
qA11 F	GACGACGACGAAGAACGA		GhCoker.D12G137700.1	n/a	n/a						guide_1	D13	100	16	0	0	6	21	31045558	31045573	4	30.7		A08G143500.1	32.99	30.45	50.81	51.47		74.02
qA11 R	GCATCCAAGTTAAACTTGATTTCAC		GhCoker.A12G131200.1	n/a	n/a						guide_1	D13	100	16	0	0	6	21	31154729	31154744	4	30.7		D08G158700.1	38.78	35.8	55.52	55.86	74.02
											guide_2	D11	100	23	0	0	1	23	9181716	9181738	0.000519	43.6
qD11 R	GCATCCAAGTTAAACTTGATTTCAT										guide_2	A11	100	23	0	0	1	23	9993416	9993438	0.000519	43.6
qA12 F1	GGTTTTAAGGACGAGGCAATGCCG										guide_2	D07	100	16	0	0	7	22	19152780	19152765	4	30.7
qA12 R1	GATAGGACCTGAACCTTCTC										guide_2	D06	100	16	0	0	6	21	6656420	6656405	4	30.7
qD12 F1	GGTTTTAAGGACGAGGCAATGCCA										guide_2	A07	100	16	0	0	7	22	24777134	24777119	4	30.7
qD12 R1	GATAGGACCTGAACCTTCTT										guide_2	A06	100	16	0	0	6	21	7806217	7806202	4	30.7
